# Supplementary material for: Surveillance of Antimicrobial Resistance of Escherichia coli Isolates from Intestinal Contents of Dairy and Veal Calves in the Veneto Region, Northeaster Italy
Source: MDPI journal article supplement (doi:10.3390/ani14101429), 2024-05-10

**Figure S1.** Temporal distribution of the minimum inhibitory concentration values (MIC,  $\mu\text{g/mL}$ ) of ampicillin (AMP), colistin (COL), enrofloxacin (ENR), florfenicol (FLO), flumequine (FLQ), gentamicin (GEN), paromomycin (PRM), tetracycline (TET), and sulfamethoxazole/trimethoprim (SX-T).

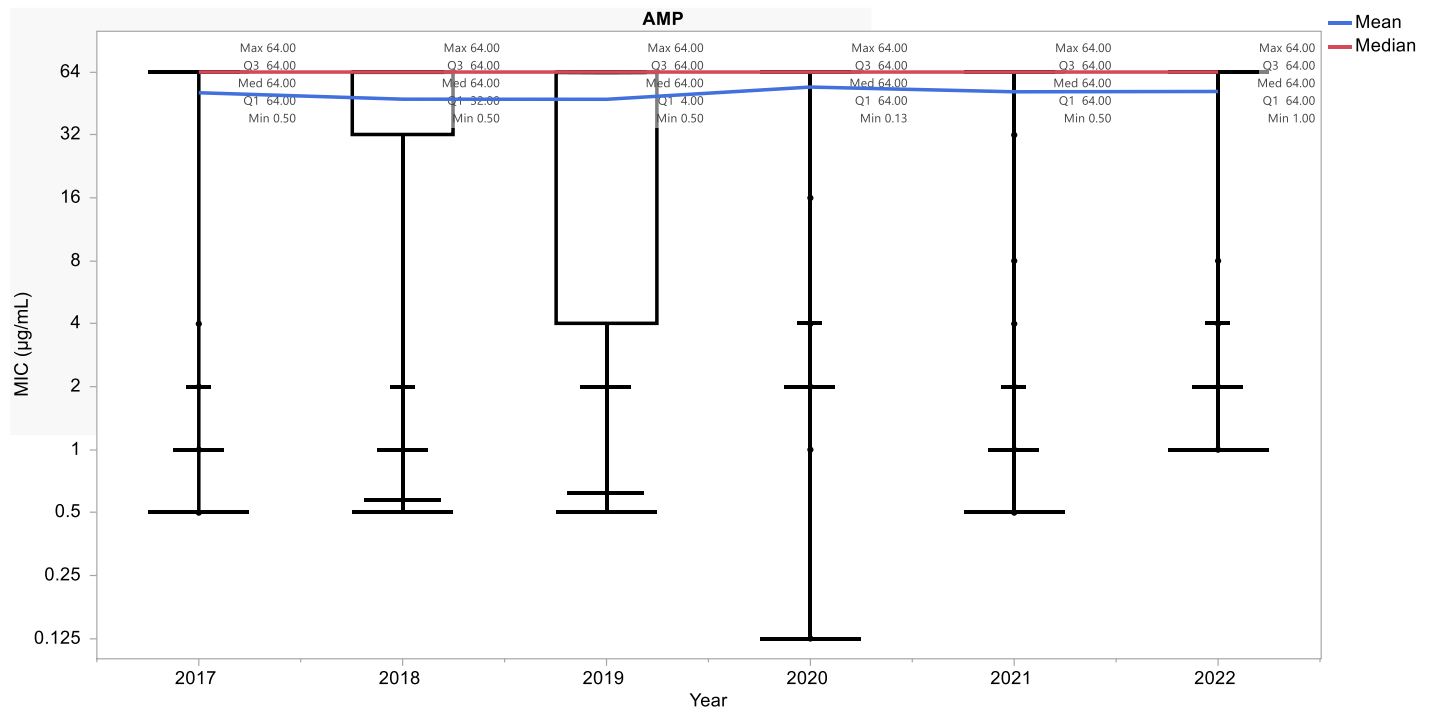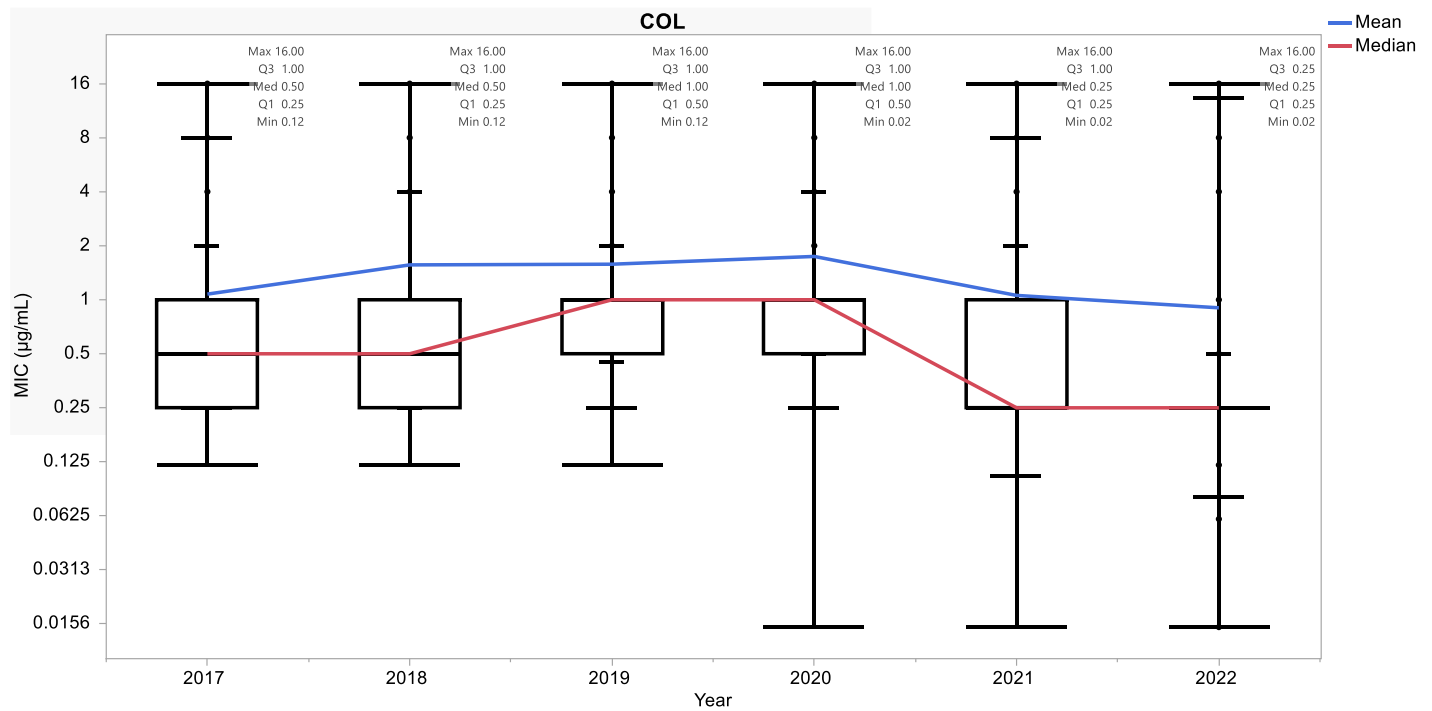

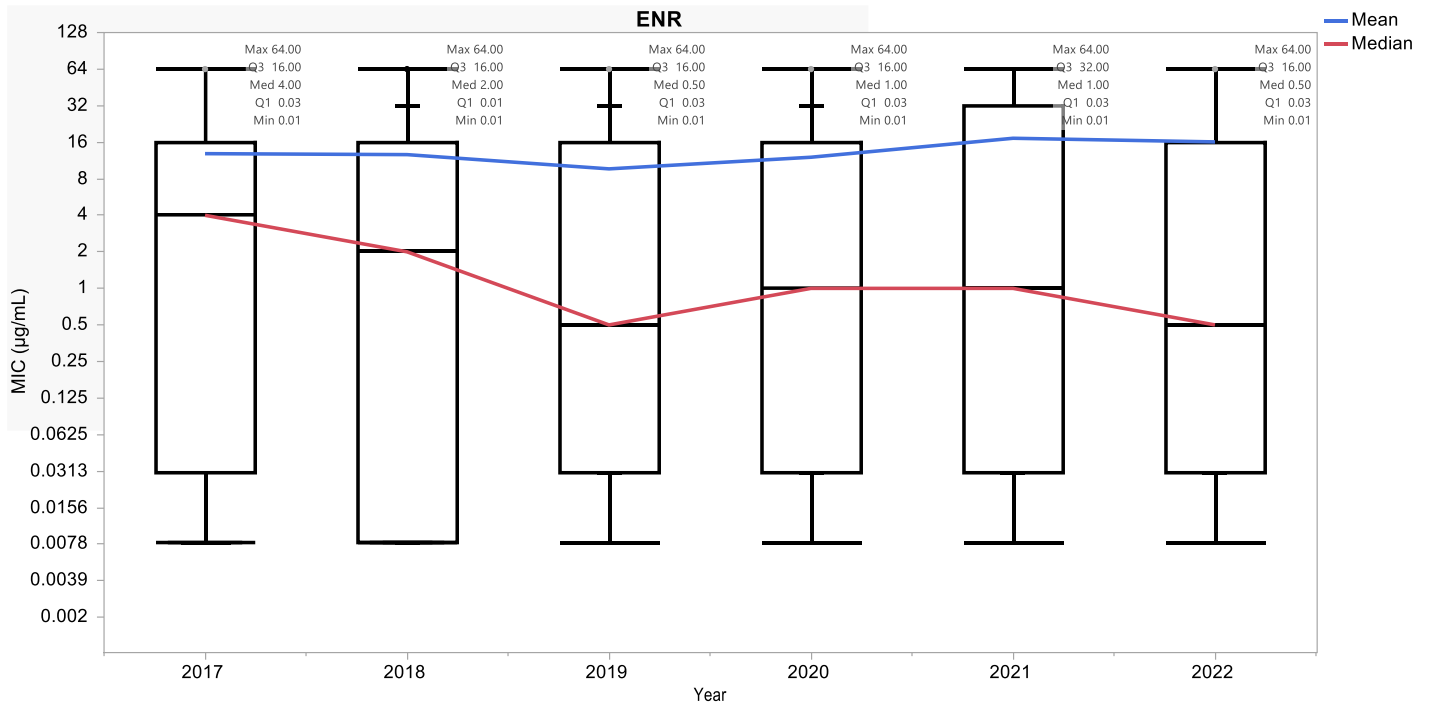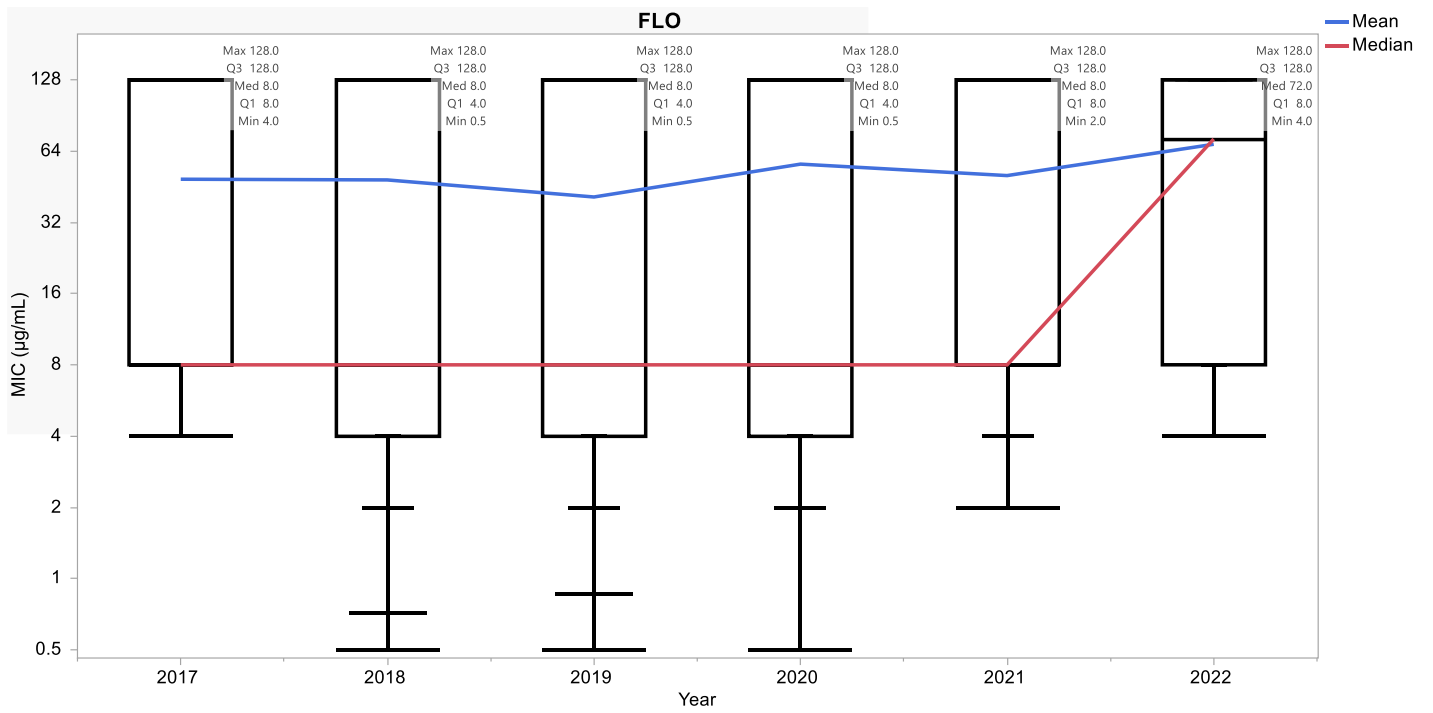

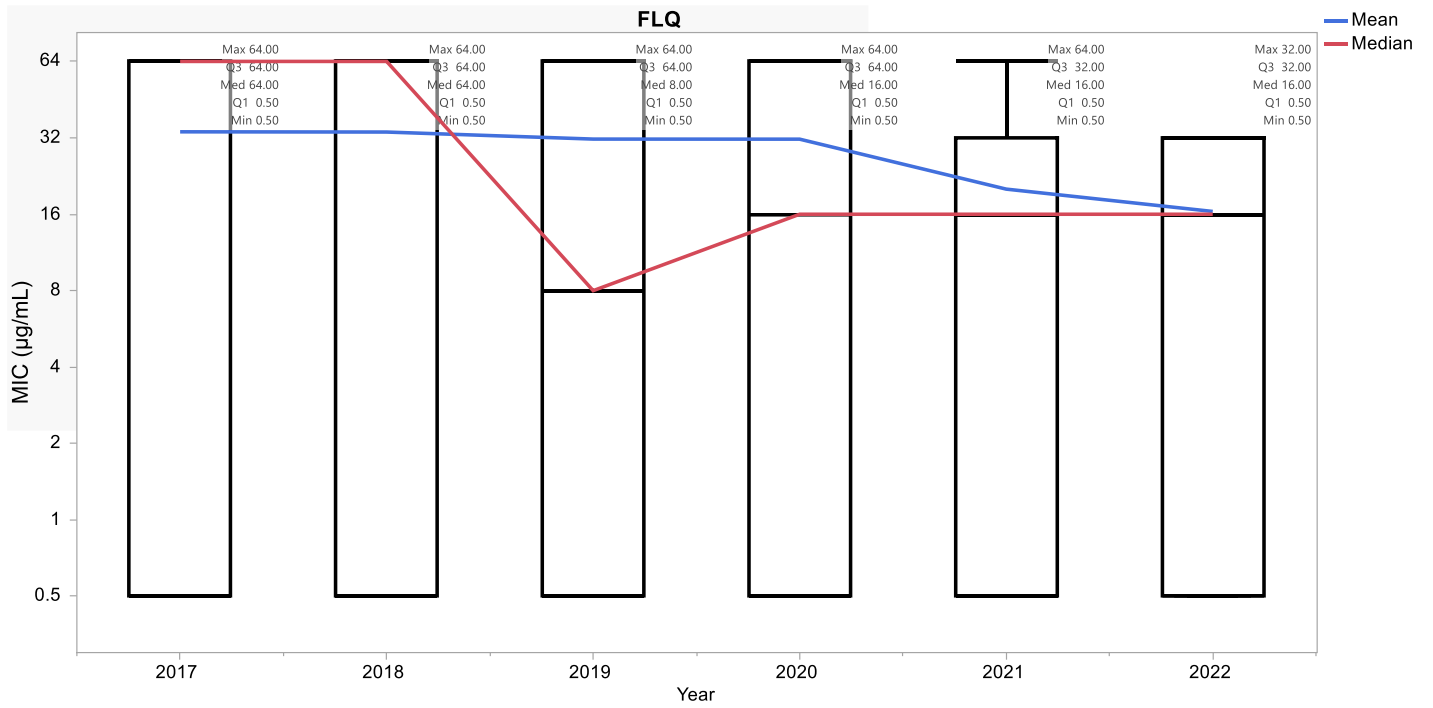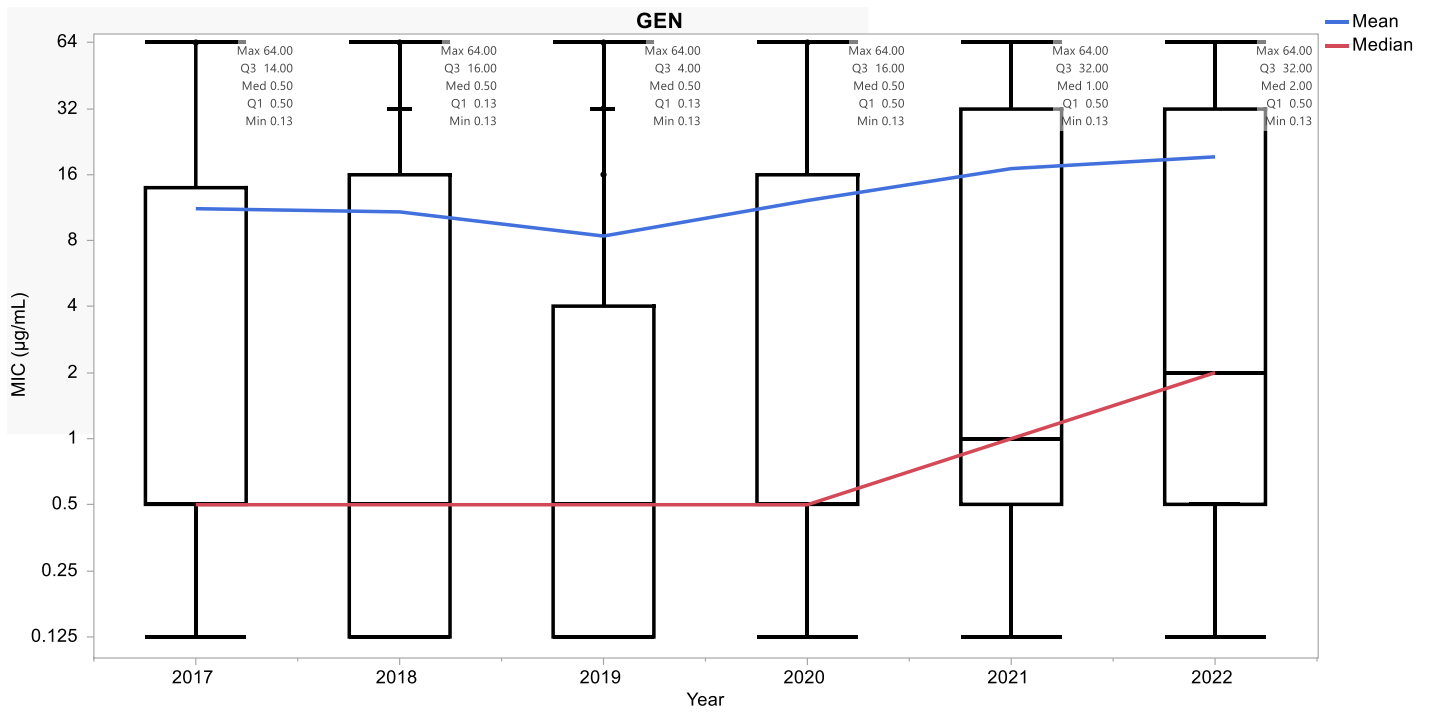

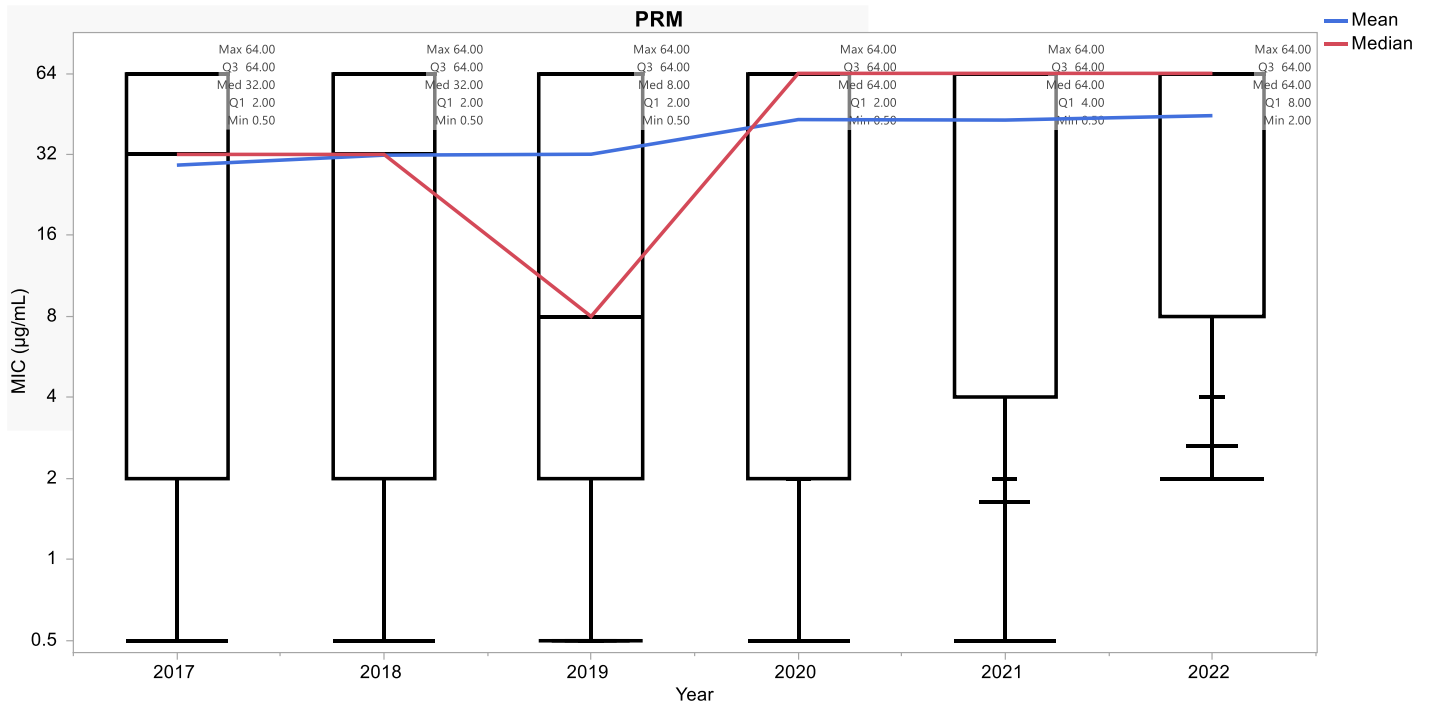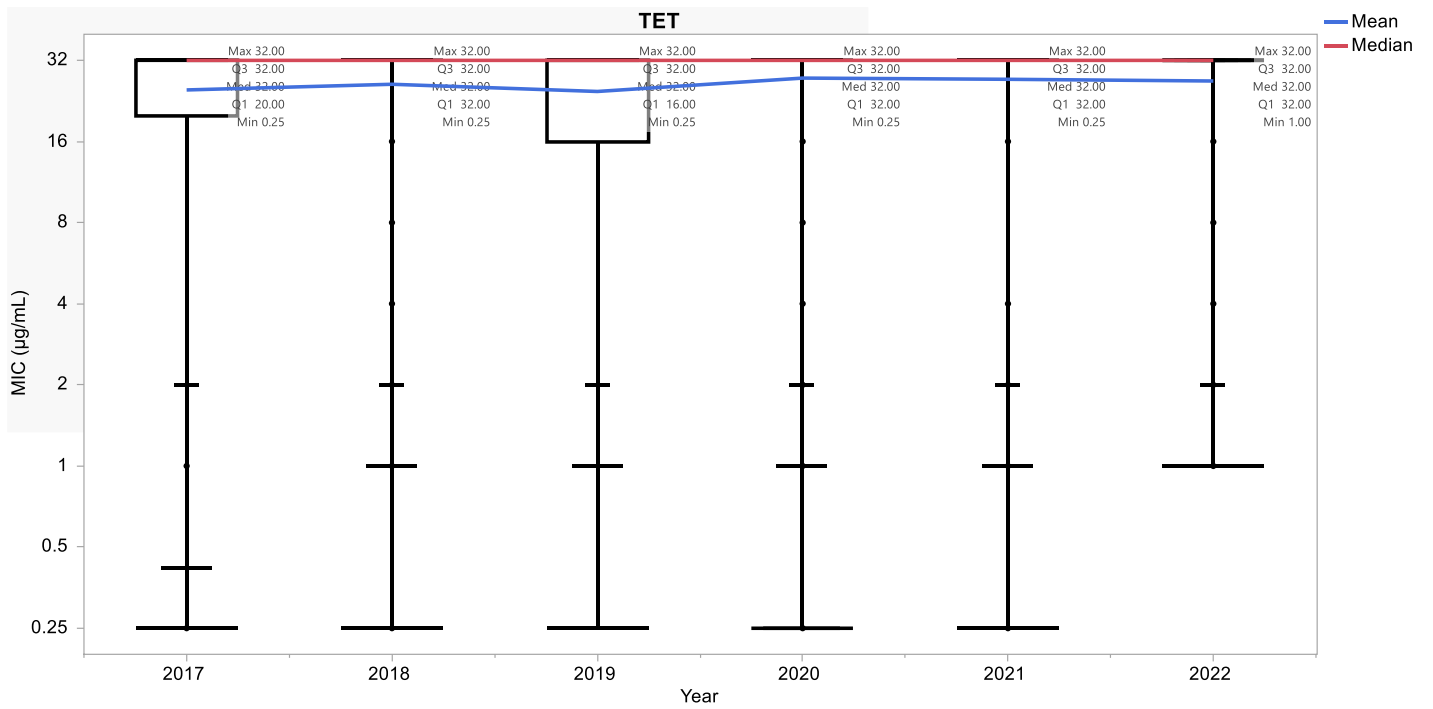

Supplement: s1 [file s1]
